# Supplementary material for: Tunable Contact Types and Interfacial Electronic Properties in TaS2/MoS2 and TaS2/WSe2 Heterostructures
Source: MDPI journal article supplement (doi:10.3390/molecules28145607), 2023-07-24
Supplement: s1 [file s1]

Support Information

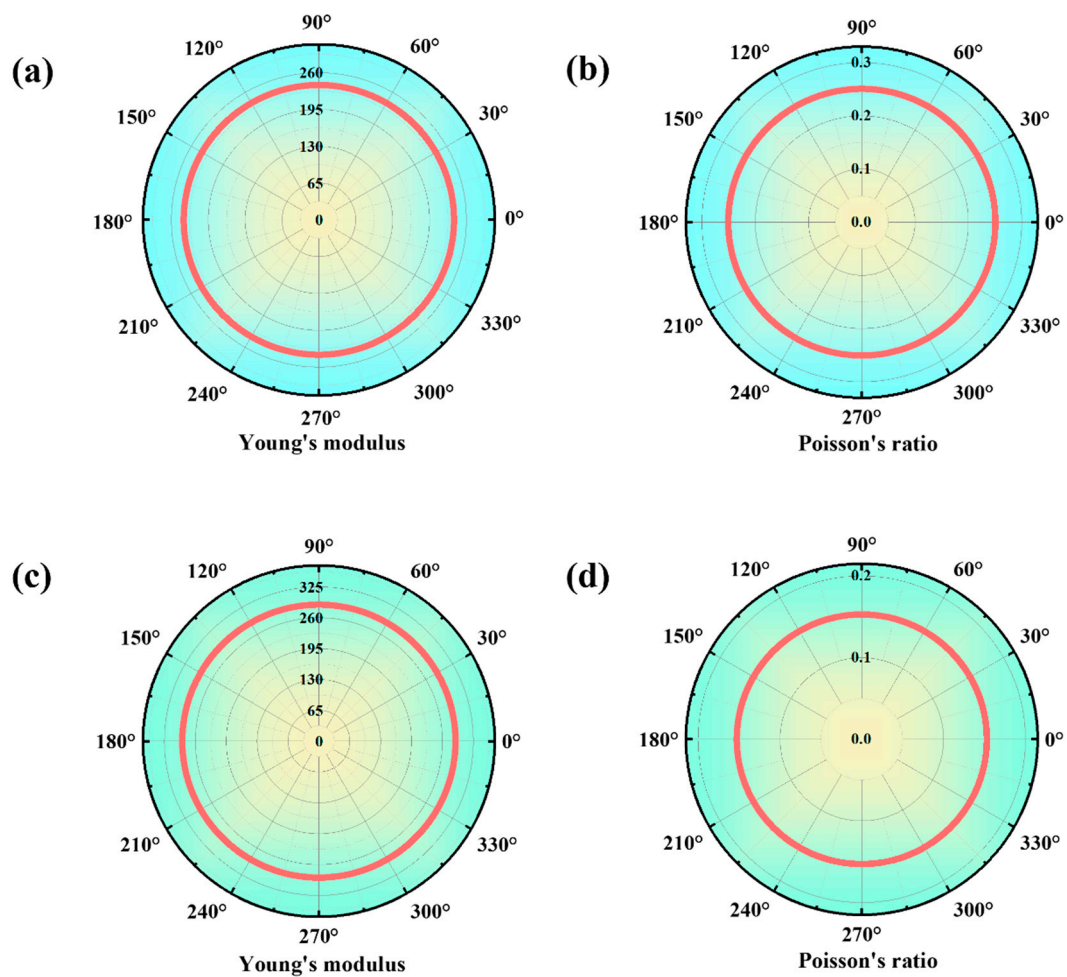

**Figure S1.** Polar Plots of (a) Young's modulus and (b) Poisson's ratio of 1T-TaS<sub>2</sub>/2H-MoS<sub>2</sub> vdWHs at the ground state. Polar Plots of (c) Young's modulus and (d) Poisson's ratio of 1T-TaS<sub>2</sub>/2H-WSe<sub>2</sub> vdWHs at the ground state.
